# Supplementary material for: Effect of Solvents on Bioactive Compounds and Antioxidant Activity of Padina Tetrastromatica and Gracilaria Tenuistipitata Seaweeds Collected From Bangladesh
Source: Research Square preprint supplement (doi:10.21203/rs.3.rs-557313/v1), 2021-06-01
Supplement: Supplementary file 1 [file c8a1d0bbdac09bef6cfa3916.docx]

| Seaweed species | Extracts | Saponin | Terpenoid | Cardiac Glycoside | Phlobatannin | Phenolic | Flavonoid |
| --- | --- | --- | --- | --- | --- | --- | --- |
| ***P. tetrastromatica*** | Methanol |  |  |  |  |  |  |
| Ethanol |  |  |  |  |  |  |
| Water |  |  |  |  |  |  |
| ***G. tenuistipitata*** | Methanol |  |  |  |  |  |  |
| Ethanol |  |  |  |  |  |  |
| Water |  |  |  |  |  |  |

**Table 1.** Preliminary phytochemical screening of different extracts of *P. tetrastromatica* and *G. tenuistipitata*. “+” = Constituent's existence; “−” = Constituent's non-existence.

| Seaweed species | Extracts | Major Functional Groups | | | | | | | |
| --- | --- | --- | --- | --- | --- | --- | --- | --- | --- |
| **Phenol** | **Carboxylic**  **acids** | **Alkoxy** | **Aromatics** | **Alkene** | **Amides/**  **Amines** | **Sulfonate** |
| *P. tetrastromatica* | Methanol |  |  |  |  |  |  |  |
| Ethanol |  |  |  |  |  |  |  |
| Water |  |  |  |  |  |  |  |
| *G. tenuistipitata* | Methanol |  |  |  |  |  |  |  |
| Ethanol |  |  |  |  |  |  |  |
| Water |  |  |  |  |  |  |  |

**Table 2.** Major functional groups of active components based on the peak value of Fourier transform infrared. “+” = Constituent's existence; “−” = Constituent's non-existence.

| Extracts | *P. tetrastromatica* | | *G. tenuistipitata* | |
| --- | --- | --- | --- | --- |
| Total Phenolics (mg of GA/g) | Total Favonoids (mg quercetin/g) | Total Phenolics (mg of GA/g) | Total Favonoids (mg quercetin/g) |
| Methanol | 85.61 ± 1.47a | 41.77 ± 1.59a | 68.20±0.92a | 36.17±2.38a |
| Ethanol | 74.59 ± 0.70b | 35.27± 1.64b | 61.65±1.27b | 26.42±0.90b |
| Water | 42.73 ± 2.09c | 22.39 ± 0.72c | 34.11±0.88c | 19.86±1.39c |

**Table 3.** Total phenolic and flavonoid content of *P. tetrastromatica* and *G. tenuistipitata* crude extracts. Different superscript letters represent things that are substantially different from one another. Significance level is p < 0.05.

| Antioxidant Assay | Seaweed Species | IC50 (mg/ml) values of different crude extracts | | | |
| --- | --- | --- | --- | --- | --- |
| Ascorbic acid | Methanol | Ethanol | Water |
| DPPH assay | *P. tetrastromatica* | 0.00297 ± 0.0005a | 0.40 ± 0.12b | 1.54 ± 0.03c | 3.31 ± 0.04d |
| *G. tenuistipitata* | 2.59 ± 0.08b | 3.68 ± 0.07c | 5.04 ± 0.10d |
| ABTS radical scavenging assay | *P. tetrastromatica* | 0.160 ± 0.006a | 1.33 ± 0.09b | 2.31 ± 0.06c | 4.22 ± 0.11d |
| *G. tenuistipitata* | 3.01 ± 0.10b | 4.69 ± 0.08c | 5.91 ± 0.03d |
| H2O2 scavenging assay | *P. tetrastromatica* | 0.0783 ± 0.004a | 3.08 ± 0.05b | 4.10 ± 0.04c | 9.41 ± 0.09d |
| *G. tenuistipitata* | 3.69 ± 0.11b | 4.78 ± 0.05c | 7.32 ± 0.07d |

**Table 4.**  Values of IC50 (mg/ml) resultant from various crude extracts of various antioxidant assays. Different superscript letters represent things that are substantially different from one another. Significance level is p < 0.05.
